# Supplementary material for: N-doped carbon nanosheets with antibacterial activity: mechanistic insight
Source: Royal Society of Chemistry journal article supplement (doi:10.1039/c4ra17049k), 2015-01-01

## Supporting Information for

### N-doped carbon nanosheets with antibacterial activity: Mechanistic insight

Amlan Chakraborty,<sup>a†</sup> Pranav Patni,<sup>a†</sup> Deepa Suhag,<sup>a†</sup> Gajender Saini,<sup>b</sup> Anirudha Singh,<sup>c</sup>  
Sandip Chakrabarti<sup>d\*</sup> and Monalisa Mukherjee<sup>a\*</sup>

<sup>a</sup>Amity Institute of Biotechnology, Amity University Uttar Pradesh 201303, India

<sup>b</sup>Advance Instrumentation Research Facility, Jawaharlal University, New Delhi, India

<sup>c</sup>Faculty of Translational Tissue Engineering Center & Dept. of Urology, Johns Hopkins School of Medicine  
Baltimore, Maryland Area

<sup>d</sup>Amity Institute of Nanotechnology, Amity University Uttar Pradesh 201303, India

## SI 1

**Table 1: Carbon, Hydrogen, Nitrogen and Oxygen percentages from CNS and CCM**

| Sample Name | C atom % | H atom % | N atom % | O atom % |
|-------------|----------|----------|----------|----------|
| CNS         | 82.01    | 1.28     | 1.75     | 14.72    |
| CCM         | 83.29    | 1.34     | 0.00     | 15.11    |

## SI 2

### XRD

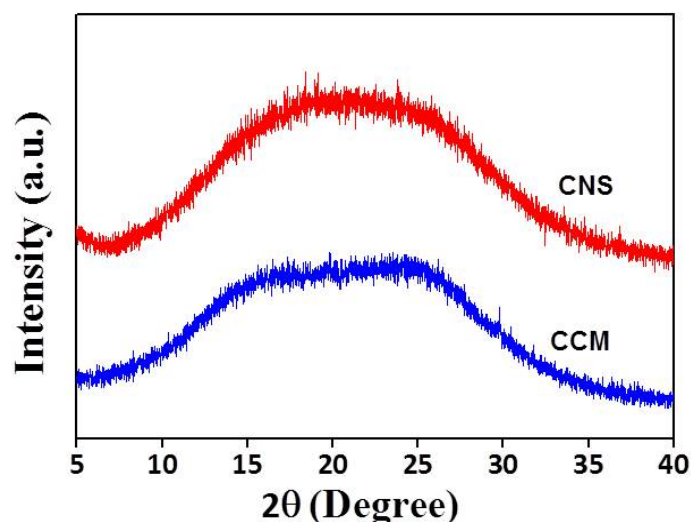

Supplement: c4ra17049k1.pdf [file c4ra17049k1.pdf]
